# Supplementary material for: New Insights into the Thermal Stability of 1-Butyl-3-methylimidazolium-Based Ionic Liquids
Source: MDPI journal article supplement (doi:10.3390/ijms231810966), 2022-09-19
Supplement: s1 [file s1]

Supplementary Materials

# New Insights into the Thermal Stability of 1-Butyl-3-methylimidazolium-based Ionic Liquids

Artyom V. Belesov, Natalya V. Shkaeva, Mark S. Popov, Tatyana E. Skrebets, Anna V. Faleva,  
Nikolay V. Ul'yanovskii and Dmitry S. Kosyakov\*

Core Facility Center “Arktika”, Northern (Arctic) Federal University, nab. Severnoy Dviny, 17, Arkhangelsk,  
163002, Russia

\* Correspondence: d.kosyakov@narfu.ru

Contents:

**Figure S1.** Aliphatic region of  $^1\text{H}$ - $^{13}\text{C}$  HSQC spectrum of [bmim]OAc.

**Figure S2.** Aromatic region of  $^1\text{H}$ - $^{13}\text{C}$  HSQC spectrum of [bmim]OAc.

**Figure S3.** Extracted ion chromatograms for [bmim]OAc (24 h, 150°C).

**Figure S4.** Selected ion mass spectrometry evolved gas analysis in STA experiments (a-[bmim]OAc; b-[bmim]Cl; c-[bmim]MeSO<sub>4</sub>).

**Figure S5.** Differential scanning calorimetry measurements (a-[bmim]OAc; b-[bmim]Cl; c-[bmim]MeSO<sub>4</sub>).

**Table S1.** Components identified on  $^1\text{H}$ - $^{13}\text{C}$  HSQC spectrum of [bmim]OAc heated to 150°C.

**Table S2.** The low-volatile IL degradation products identified by HPLC-HRMS before (0-h) and after 6- and 24-h thermal treatment at 150°C.

**Table S3.** Mass spectra of IL major degradation products detected by HPLC-HRMS.

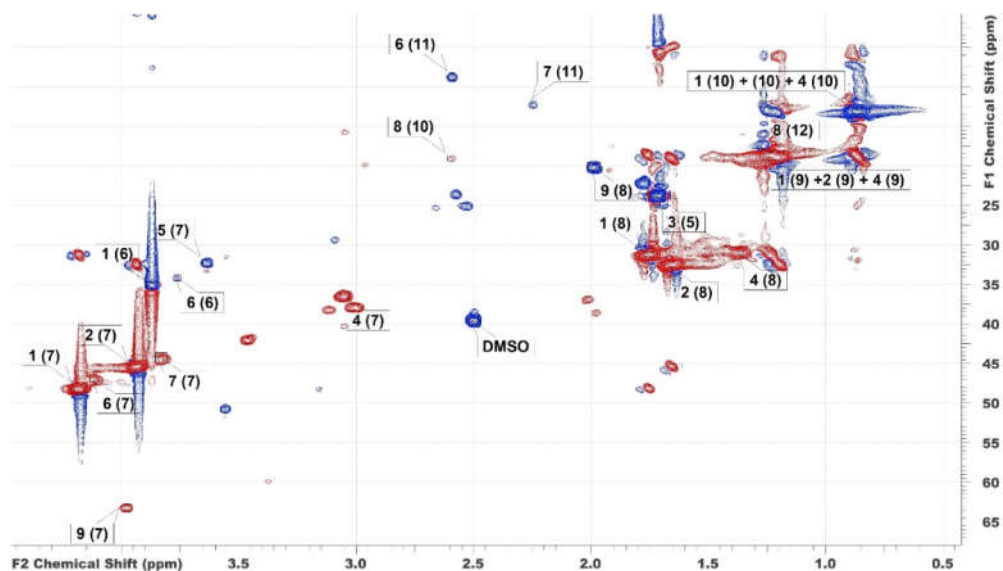

**Figure S1.** Aliphatic region of  $^1\text{H}$ - $^{13}\text{C}$  HSQC spectrum of [bmim]OAc.

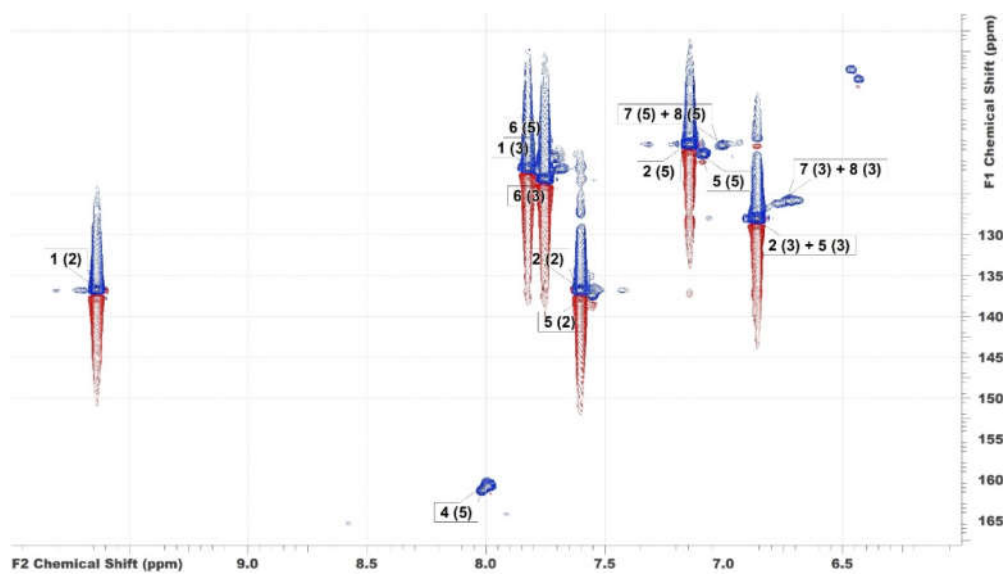

**Figure S2.** Aromatic region of  $^1\text{H}$ - $^{13}\text{C}$  HSQC spectrum of [bmim]OAc.

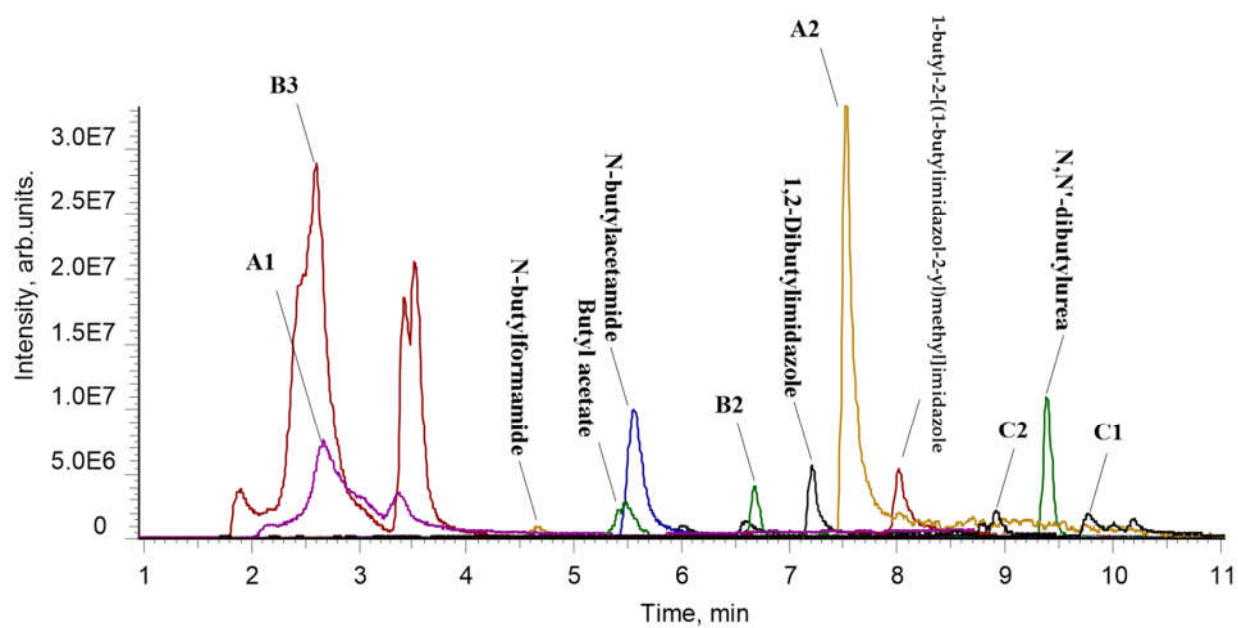

**Figure S3.** Extracted ion chromatograms for [bmim]OAc (24 h, 150°C).

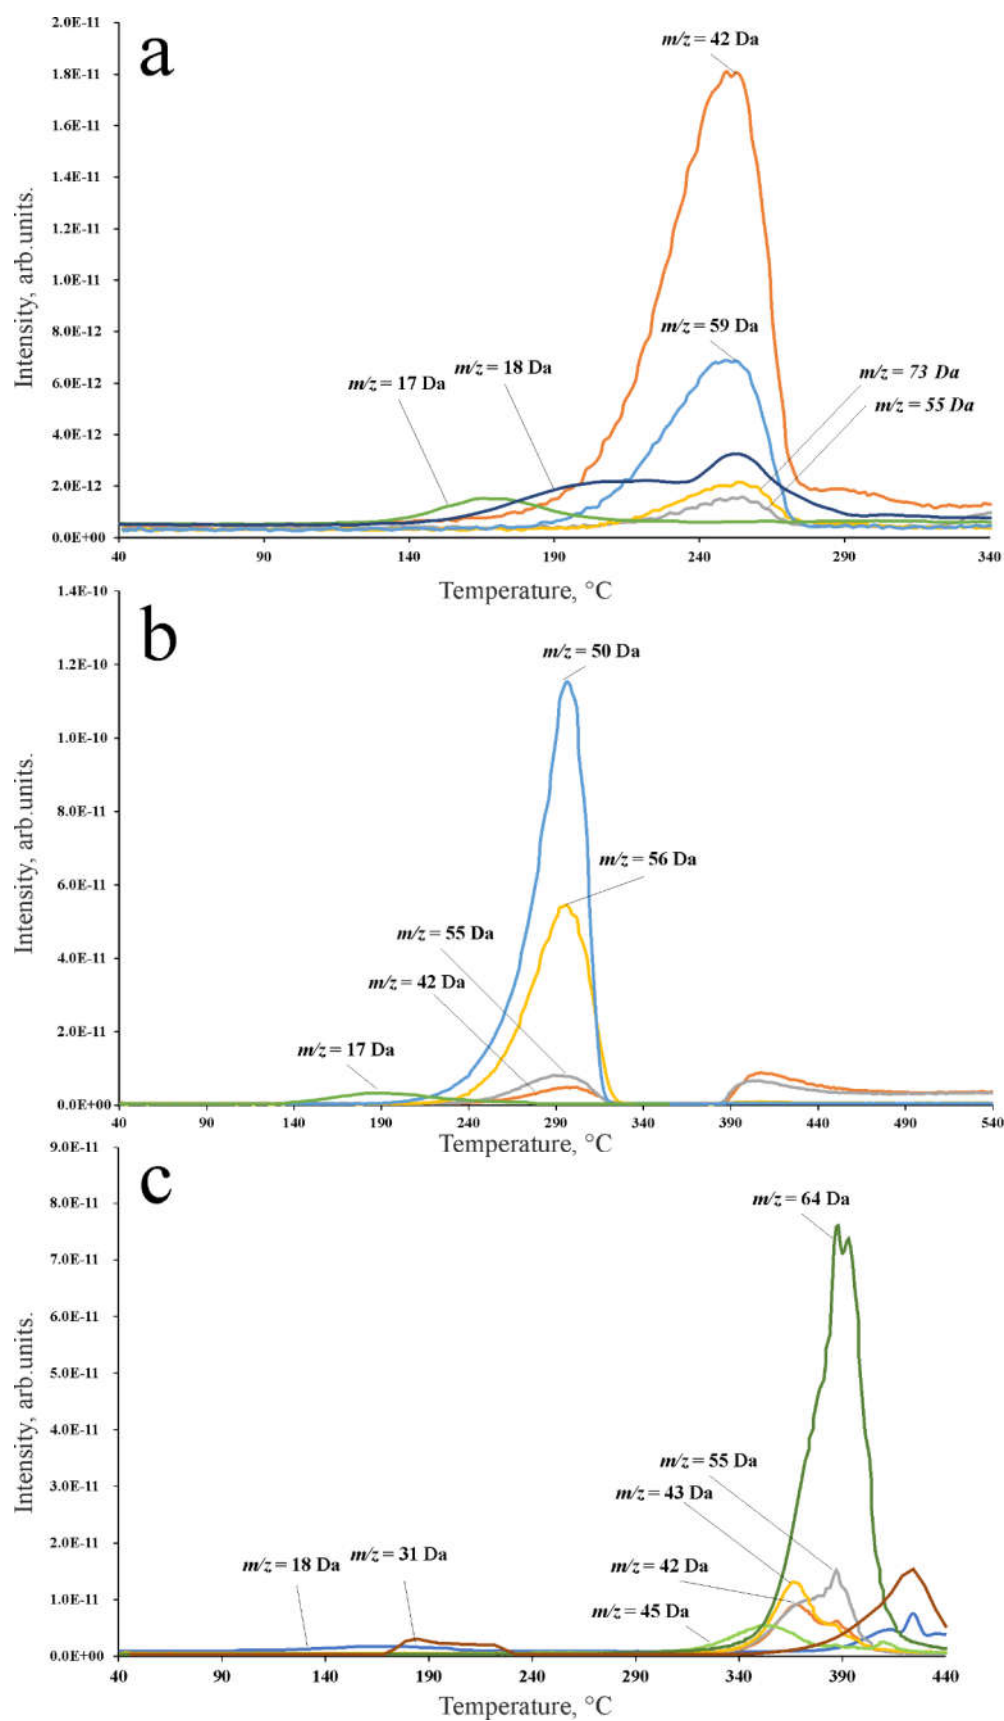

**Figure S4.** Selected ion mass spectrometry evolved gas analysis in STA experiments (a-[bmim]OAc; b-[bmim]Cl; c-[bmim]MeSO<sub>4</sub>).

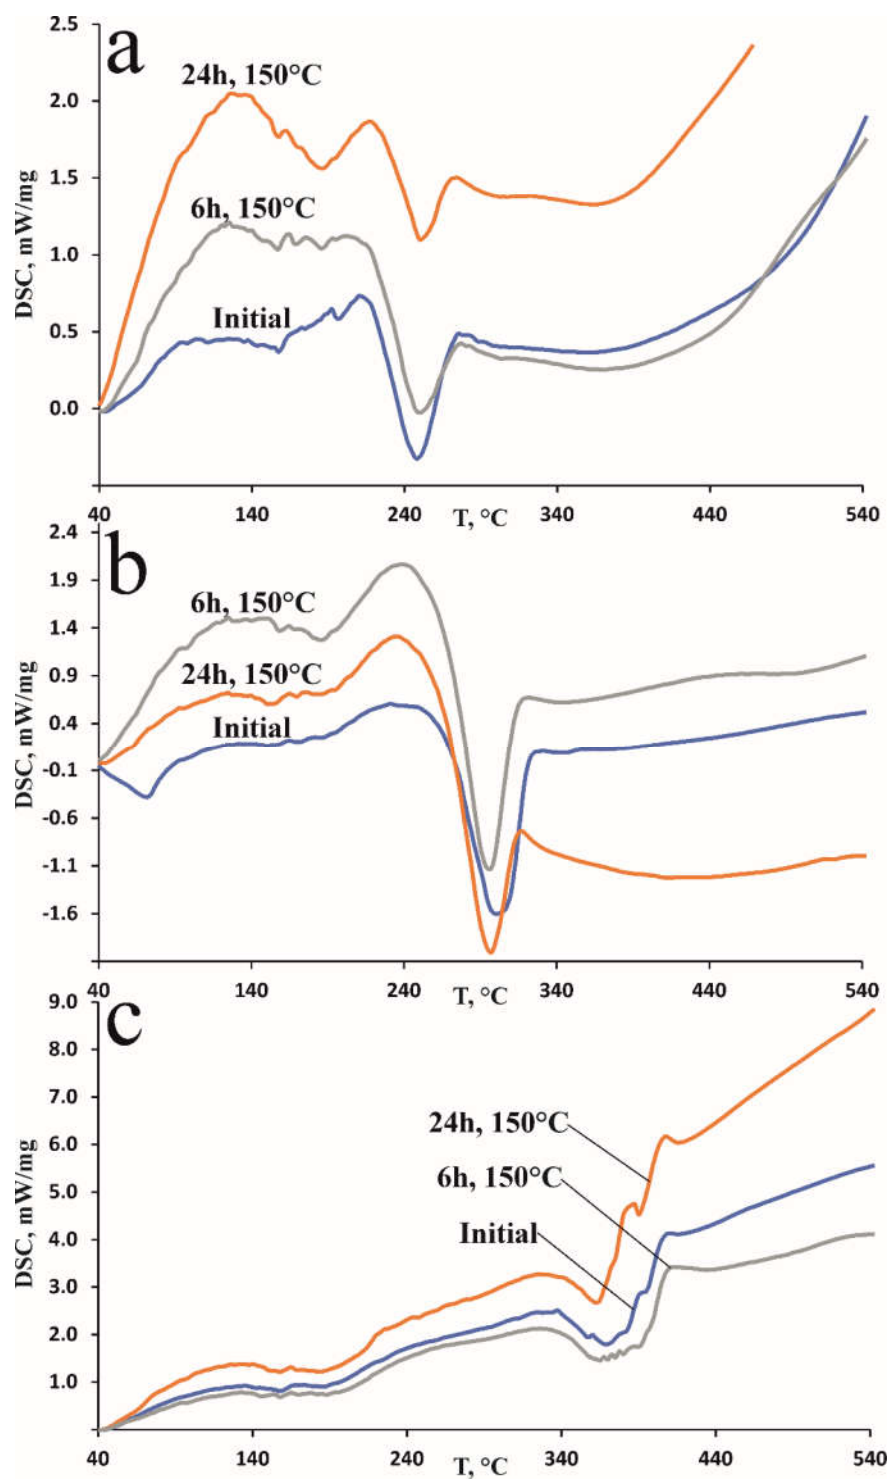

Figure S5. Differential scanning calorimetry measurements (a-[bmim]OAc; b-[bmim]Cl; c-[bmim]MeSO<sub>4</sub>).

**Table S1.** Components identified on  $^1\text{H}$ - $^{13}\text{C}$  HSQC spectrum of [bmim]OAc heated to  $150^\circ\text{C}$ .

| # | Structure                                                                           | Formula                               | FW       |
|---|-------------------------------------------------------------------------------------|---------------------------------------|----------|
| 1 | 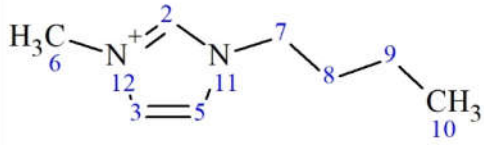   | $\text{C}_8\text{H}_{15}\text{N}_2^+$ | 139.2176 |
| 2 |    | $\text{C}_7\text{H}_{12}\text{N}_2$   | 124.1836 |
| 3 |    | $\text{C}_2\text{H}_3\text{O}_2^-$    | 59.0446  |
| 4 |    | $\text{C}_5\text{H}_{11}\text{NO}$    | 101.1469 |
| 5 |  | $\text{C}_4\text{H}_6\text{N}_2$      | 82.1038  |
| 6 |  | $\text{C}_9\text{H}_{17}\text{N}_2^+$ | 153.2441 |
| 7 |  | $\text{C}_8\text{H}_{14}\text{N}_2$   | 138.2102 |
| 8 |  | $\text{C}_9\text{H}_{16}\text{N}_2$   | 152.2367 |
| 9 |  | $\text{C}_6\text{H}_{12}\text{O}_2$   | 116.1583 |

**Table S2.** The low-volatile IL degradation products identified by HPLC-HRMS before (0-h) and after 6- and 24-h thermal treatment at 150°C.

| Compound                                          | Formula                                                                       | <i>m/z</i> | <i>Δ</i> , ppm | RT, min | Chromatographic peak area, arb. Units ·10 <sup>6</sup> |            |             |
|---------------------------------------------------|-------------------------------------------------------------------------------|------------|----------------|---------|--------------------------------------------------------|------------|-------------|
|                                                   |                                                                               |            |                |         | 0 h                                                    | 6 h, 150°C | 24 h, 150°C |
| [bmim]OAc                                         |                                                                               |            |                |         |                                                        |            |             |
| A1                                                | [C <sub>9</sub> H <sub>17</sub> N <sub>2</sub> ] <sup>+</sup>                 | 153.1386   | 0.29           | 2.56    | 4                                                      | 6          | 21          |
| A2                                                | [C <sub>12</sub> H <sub>23</sub> N <sub>2</sub> ] <sup>+</sup>                | 195.1854   | 0.97           | 7.54    | 1                                                      | 172        | 288         |
| B1                                                | [C <sub>10</sub> H <sub>17</sub> N <sub>2</sub> O <sub>2</sub> ] <sup>+</sup> | 197.1284   | 0.36           | 3.18    | 1                                                      | 2          | 4           |
| B2                                                | [C <sub>11</sub> H <sub>19</sub> N <sub>2</sub> O <sub>2</sub> ] <sup>+</sup> | 211.1803   | 0.30           | 6.68    | 26                                                     | 106        | 233         |
| B3                                                | [C <sub>9</sub> H <sub>15</sub> N <sub>2</sub> O <sub>2</sub> ] <sup>+</sup>  | 183.1128   | 0.92           | 2.61    | 1                                                      | 429        | 499         |
| C1                                                | [C <sub>16</sub> H <sub>27</sub> N <sub>4</sub> ] <sup>+</sup>                | 303.2543   | 0.14           | 9.79    | 1                                                      | 25         | 56          |
| C2                                                | [C <sub>18</sub> H <sub>31</sub> N <sub>4</sub> ] <sup>+</sup>                | 275.2232   | 0.88           | 8.93    | 0                                                      | 1          | 10          |
| 1-Butylimidazole                                  | [C <sub>7</sub> H <sub>13</sub> N <sub>2</sub> ] <sup>+</sup>                 | 125.1073   | 0.51           | 1.79    | 12                                                     | 510        | 1344        |
| 1-Butyl-2-methylimidazole                         | [C <sub>8</sub> H <sub>15</sub> N <sub>2</sub> ] <sup>+</sup>                 | 139.1228   | 0.75           | 2.12    | 1                                                      | 19         | 14          |
| Butyl acetate                                     | [C <sub>6</sub> H <sub>13</sub> O <sub>2</sub> ] <sup>+</sup>                 | 117.1005   | 1.68           | 5.57    | 2                                                      | 31         | 117         |
| N-butylformamide                                  | [C <sub>5</sub> H <sub>12</sub> NO] <sup>+</sup>                              | 102.0913   | 0.08           | 4.66    | 0                                                      | 12         | 14          |
| N-butylacetamide                                  | [C <sub>6</sub> H <sub>14</sub> NO] <sup>+</sup>                              | 116.1069   | 0.78           | 5.58    | 3                                                      | 34         | 125         |
| 2,4,5-Trimethyl-1-butylimidazole                  | [C <sub>10</sub> H <sub>19</sub> N <sub>2</sub> ] <sup>+</sup>                | 167.1542   | 0.63           | 3.75    | 0                                                      | 189        | 340         |
| N,N'-dibutylurea                                  | [C <sub>9</sub> H <sub>21</sub> N <sub>2</sub> O] <sup>+</sup>                | 173.1647   | 0.72           | 9.41    | 9                                                      | 106        | 178         |
| 1-butyl-2-[(1-butylimidazol-2-yl)methyl]imidazole | [C <sub>15</sub> H <sub>25</sub> N <sub>4</sub> ] <sup>+</sup>                | 261.2074   | 0.09           | 8.04    | 0                                                      | 51         | 66          |
| 1,2-Dibutylimidazole                              | [C <sub>11</sub> H <sub>21</sub> N <sub>2</sub> ] <sup>+</sup>                | 181.1699   | 0.26           | 7.24    | 0                                                      | 8          | 44          |
| [bmim]Cl                                          |                                                                               |            |                |         |                                                        |            |             |
| A1                                                | [C <sub>9</sub> H <sub>17</sub> N <sub>2</sub> ] <sup>+</sup>                 | 153.1386   | 0.60           | 3.07    | 0                                                      | 12         | 14          |
| A2                                                | [C <sub>12</sub> H <sub>23</sub> N <sub>2</sub> ] <sup>+</sup>                | 195.1856   | 0.17           | 7.92    | 0                                                      | 0          | 1           |
| 1-Butylimidazole                                  | [C <sub>7</sub> H <sub>13</sub> N <sub>2</sub> ] <sup>+</sup>                 | 125.1073   | 0.87           | 1.79    | 6                                                      | 86         | 123         |
| 1,2-Dibutylimidazole                              | [C <sub>11</sub> H <sub>21</sub> N <sub>2</sub> ] <sup>+</sup>                | 181.1698   | 0.89           | 7.30    | 2                                                      | 12         | 194         |
| [bmim]MeSO <sub>4</sub>                           |                                                                               |            |                |         |                                                        |            |             |
| 1-Butyl-2-methylimidazole                         | [C <sub>8</sub> H <sub>15</sub> N <sub>2</sub> ] <sup>+</sup>                 | 139.1228   | 0.75           | 2.12    | 0                                                      | 1          | 4           |

**Table S3.** Mass spectra of IL major degradation products detected by HPLC-HRMS.

| Compound | RDB | m/z, Da  | MS <sup>2</sup>                                                                                                                                                                                                                                                                                     | MS <sup>3</sup>                                                                                                                                                                                                                                                                   |
|----------|-----|----------|-----------------------------------------------------------------------------------------------------------------------------------------------------------------------------------------------------------------------------------------------------------------------------------------------------|-----------------------------------------------------------------------------------------------------------------------------------------------------------------------------------------------------------------------------------------------------------------------------------|
| A1       | 3   | 153.1385 | 153.1384(C <sub>9</sub> H <sub>17</sub> N <sub>2</sub> ) - 100%<br>*97.0758(C <sub>5</sub> H <sub>9</sub> N <sub>2</sub> ) - 79%                                                                                                                                                                    | 97.0758(C <sub>5</sub> H <sub>9</sub> N <sub>2</sub> ) - 100%<br>53.0494(C <sub>3</sub> H <sub>6</sub> N) - 22%                                                                                                                                                                   |
| A2       |     | 195.1854 | 195.1854(C <sub>12</sub> H <sub>23</sub> N <sub>2</sub> ) - 100%<br>*138.0660(C <sub>8</sub> H <sub>14</sub> N <sub>2</sub> ) - 15%<br>139.1228(C <sub>8</sub> H <sub>15</sub> N <sub>2</sub> ) - 5%                                                                                                | 138.0660(C <sub>8</sub> H <sub>14</sub> N <sub>2</sub> ) - 100%<br>83.0602(C <sub>4</sub> H <sub>7</sub> N <sub>2</sub> ) - 5%                                                                                                                                                    |
| B1       | 4   | 197.1284 | 197.1284(C <sub>10</sub> H <sub>17</sub> O <sub>2</sub> N <sub>2</sub> ) - 100%<br>*141.0657(C <sub>6</sub> H <sub>9</sub> O <sub>2</sub> N <sub>2</sub> ) - 30%<br>137.1072(C <sub>8</sub> H <sub>13</sub> N <sub>2</sub> ) - 5%<br>123.0914(C <sub>7</sub> H <sub>11</sub> N <sub>2</sub> ) - 4%  | 141.0657(C <sub>6</sub> H <sub>9</sub> O <sub>2</sub> N <sub>2</sub> ) - 100%<br>97.0758(C <sub>5</sub> H <sub>9</sub> N <sub>2</sub> ) - 31%<br>56.0494(C <sub>3</sub> H <sub>6</sub> N) - 18%                                                                                   |
| B2       |     | 211.1441 | 211.1441(C <sub>11</sub> H <sub>19</sub> O <sub>2</sub> N <sub>2</sub> ) - 100%<br>*155.0814(C <sub>7</sub> H <sub>11</sub> O <sub>2</sub> N <sub>2</sub> ) - 22%<br>151.1229(C <sub>9</sub> H <sub>15</sub> N <sub>2</sub> ) - 4%<br>137.1072(C <sub>8</sub> H <sub>13</sub> N <sub>2</sub> ) - 5% | 155.0814(C <sub>7</sub> H <sub>11</sub> O <sub>2</sub> N <sub>2</sub> ) - 100%<br>137.0708(C <sub>7</sub> H <sub>9</sub> ON <sub>2</sub> ) - 12%<br>111.0914(C <sub>6</sub> H <sub>11</sub> N <sub>2</sub> ) - 23%<br>83.0602(C <sub>4</sub> H <sub>7</sub> N <sub>2</sub> ) - 5% |
| B3       |     | 183.1127 | 183.1126(C <sub>9</sub> H <sub>15</sub> O <sub>2</sub> N <sub>2</sub> ) - 100%<br>*127.0500(C <sub>5</sub> H <sub>7</sub> O <sub>2</sub> N <sub>2</sub> ) - 50%                                                                                                                                     | 127.0500(C <sub>5</sub> H <sub>7</sub> O <sub>2</sub> N <sub>2</sub> ) - 100%<br>109.0395(C <sub>5</sub> H <sub>5</sub> ON <sub>2</sub> ) - 21%<br>95.0238(C <sub>4</sub> H <sub>3</sub> ON <sub>2</sub> ) - 4%<br>83.0602(C <sub>4</sub> H <sub>7</sub> N <sub>2</sub> ) - 48%   |
| C1       | 7   | 303.2544 | 303.2544(C <sub>18</sub> H <sub>31</sub> N <sub>4</sub> ) - 100%<br>*247.1917(C <sub>14</sub> H <sub>23</sub> N <sub>4</sub> ) - 8%<br>179.1542(C <sub>11</sub> H <sub>19</sub> N <sub>2</sub> ) - 17%<br>137.1074(C <sub>8</sub> H <sub>13</sub> N <sub>2</sub> ) - 4%                             | 247.1917(C <sub>14</sub> H <sub>23</sub> N <sub>4</sub> ) - 100%<br>191.1290(C <sub>10</sub> H <sub>15</sub> N <sub>4</sub> ) - 60%                                                                                                                                               |
| C2       |     | 275.2231 | 275.2231(C <sub>16</sub> H <sub>27</sub> N <sub>4</sub> ) - 100%<br>*219.1604(C <sub>12</sub> H <sub>19</sub> N <sub>4</sub> ) - 7%<br>163.0978(C <sub>8</sub> H <sub>11</sub> N <sub>4</sub> ) - 2%<br>137.1072(C <sub>8</sub> H <sub>13</sub> N <sub>2</sub> ) - 1%                               | 219.1604(C <sub>12</sub> H <sub>19</sub> N <sub>4</sub> ) - 100%<br>163.0976(C <sub>8</sub> H <sub>11</sub> N <sub>4</sub> ) - 88%                                                                                                                                                |
